# Supplementary material
Source: PubMed Central journal article supplement (PMC1829228)
Supplement: pnas_0700715104_3.pdf [file pnas_0700715104_3.pdf]

| Dataset. ER $\alpha$ -bound Promoters in E2-MCF7 Cells |             |              |                                                                                              |             |          |
|--------------------------------------------------------|-------------|--------------|----------------------------------------------------------------------------------------------|-------------|----------|
| #                                                      | Gene Name   | RefSeq       | Gene Description                                                                             | ER $\alpha$ |          |
|                                                        |             |              |                                                                                              | Ratio       | P-value  |
| 1                                                      | STRBP       | NM_018387    | spermatid perinuclear RNA binding protein                                                    | 82.06       | 0        |
| 2                                                      | C11ORF4     | NM_020155    | chromosome 11 hypothetical protein ORF4                                                      | 59.44       | 0        |
| 3                                                      | GPR77       | NM_018485    | G protein-coupled receptor 77                                                                | 52.97       | 0        |
| 4                                                      | HNRPA2B1    | NM_031243    | heterogeneous nuclear ribonucleoprotein A2/B1                                                | 35.54       | 0        |
| 5                                                      | SUB1P1      | XM_496965    | similar to Activated RNA polymerase II transcriptional coactivator p15 (Positive cofactor 4) | 34.82       | 0        |
| 6                                                      | DICER1      | NM_177438    | Dicer1, Dcr-1 homolog (Drosophila)                                                           | 31.3        | 0        |
| 7                                                      | TFF1        | NM_003225    | trefoil factor 1 (breast cancer, estrogen-inducible sequence expressed in)                   | 31          | 0        |
| 8                                                      | NUDT3       | NM_006703    | nudix (nucleoside diphosphate linked moiety X)-type motif 3                                  | 30.65       | 0        |
| 9                                                      | DDX17       | NM_006386    | DEAD (Asp-Glu-Ala-Asp) box polypeptide 17                                                    | 27.45       | 0        |
| 10                                                     | CHPT1       | NM_020244    | choline phosphotransferase 1                                                                 | 25.74       | 0        |
| 11                                                     | LY6E        | NM_002346    | lymphocyte antigen 6 complex, locus E                                                        | 23.97       | 0.000001 |
| 12                                                     | ZNF669      | NM_024804    | zinc finger protein 669                                                                      | 21.99       | 0        |
| 13                                                     | PPIA        | NM_021130    | peptidylprolyl isomerase A (cyclophilin A)                                                   | 19.74       | 0        |
| 14                                                     | ABCC11      | NM_032583    | ATP-binding cassette, sub-family C (CFTR/MRP), member 11                                     | 19.47       | 0        |
| 15                                                     | GABARAP     | NM_007278    | GABA(A) receptor-associated protein                                                          | 19.34       | 0        |
| 16                                                     | GSK3A       | NM_019884    | glycogen synthase kinase 3 alpha                                                             | 18.98       | 0        |
| 17                                                     | ZNF395      | NM_018660    | zinc finger protein 395                                                                      | 17.49       | 0        |
| 18                                                     | C9orf90     | NM_197956    | chromosome 9 open reading frame 90                                                           | 17.46       | 0        |
| 19                                                     | SLC25A25    | NM_001006641 | solute carrier family 25 (mitochondrial carrier; phosphate carrier), member 25               | 17.46       | 0        |
| 20                                                     | SLTM        | NM_024755    | SAFB-like, transcription modulator                                                           | 16.36       | 0        |
| 21                                                     | LOC147354   | XM_085777    | similar to additional sex combs like 2; polycomb group protein ASXH2                         | 16.22       | 0        |
| 22                                                     | MAX         | NM_145112    | MAX protein                                                                                  | 15.7        | 0        |
| 23                                                     | CALCOCO1    | NM_020898    | calcium binding and coiled-coil domain 1                                                     | 15.31       | 0        |
| 24                                                     | MGC72075    | NM_199136    | hypothetical protein MGC72075                                                                | 15.19       | 0        |
| 25                                                     | FAM44B      | NM_138369    | family with sequence similarity 44, member B                                                 | 14.56       | 0        |
| 26                                                     | EIF4G2      | NM_001418    | eukaryotic translation initiation factor 4 gamma, 2                                          | 14.21       | 0        |
| 27                                                     | URKL1       | NM_017859    | uridine kinase-like 1                                                                        | 13.85       | 0        |
| 28                                                     | SLC45A4     | XM_050325    | KIAA1126 protein                                                                             | 13.67       | 0        |
| 29                                                     | SLC25A36    | NM_018155    | hypothetical protein FLJ10618                                                                | 13.66       | 0        |
| 30                                                     | ANXA9       | NM_003568    | annexin A9                                                                                   | 13.51       | 0        |
| 31                                                     | ST3GAL2     | NM_006927    | ST3 beta-galactoside alpha-2,3-sialyltransferase 2                                           | 12.91       | 0        |
| 32                                                     | SHANK3      | XM_037493    | SH3 and multiple ankyrin repeat domains 3                                                    | 12.86       | 0        |
| 33                                                     | TSNAXIP1    | NM_018430    | translin-associated factor X interacting protein 1                                           | 12.82       | 0        |
| 34                                                     | ENY2        | NM_020189    | enhancer of yellow 2 homolog (Drosophila)                                                    | 12.62       | 0        |
| 35                                                     | FLJ13265    | NM_024877    | hypothetical protein FLJ13265                                                                | 12.62       | 0        |
| 36                                                     | C18ORF55    | NM_014177    | HSPC154 protein                                                                              | 12.42       | 0        |
| 37                                                     | BANP        | NM_017869    | BTG3 associated nuclear protein                                                              | 12.33       | 0        |
| 38                                                     | Gup1        | NM_152451    | GRINL1A complex upstream protein                                                             | 12.33       | 0        |
| 39                                                     | PRCC        | NM_005973    | papillary renal cell carcinoma (translocation-associated)                                    | 12.14       | 0        |
| 40                                                     | RC74        | NM_018250    | integrator complex subunit 9                                                                 | 12.11       | 0        |
| 41                                                     | FLJ21616    | NM_024567    | hypothetical protein FLJ21616                                                                | 12.11       | 0        |
| 42                                                     | SMPD3       | NM_018667    | sphingomyelin phosphodiesterase 3, neutral membrane (neutral sphingomyelinase II)            | 11.98       | 0        |
| 43                                                     | FLJ30277    | NM_153008    | hypothetical protein FLJ30277                                                                | 11.71       | 0        |
| 44                                                     | IMP-3       | NM_006547    | IGF-II mRNA-binding protein 3                                                                | 11.6        | 0        |
| 45                                                     | TAF6L       | NM_006473    | TAF6-like RNA polymerase II, p300/CBP-associated factor (PCAF)-associated factor, 65kD       | 11.52       | 0        |
| 46                                                     | LOC374395   | NM_199337    | similar to RIKEN cDNA 1810059G22                                                             | 11.52       | 0        |
| 47                                                     | PDCD6IP     | NM_013374    | programmed cell death 6 interacting protein                                                  | 11.43       | 0.000001 |
| 48                                                     | GREB1       | NM_014668    | GREB1 protein                                                                                | 11.43       | 0        |
| 49                                                     | RANBP10     | NM_020850    | Ran-binding protein 10                                                                       | 11.39       | 0        |
| 50                                                     | JUND        | NM_005354    | jun D proto-oncogene                                                                         | 11.01       | 0        |
| 51                                                     | LOC340549   | XM_293332    | similar to RIKEN cDNA 1700113O17                                                             | 10.97       | 0        |
| 52                                                     | FLJ33718    | NM_173660    | hypothetical protein FLJ33718                                                                | 10.9        | 0        |
| 53                                                     | WISP2       | NM_003881    | WNT1 inducible signaling pathway protein 2                                                   | 10.62       | 0        |
| 54                                                     | LOC391714   | XM_373039    | similar to ring finger protein 129                                                           | 10.44       | 0        |
| 55                                                     | BAD         | NM_004322    | BCL2-antagonist of cell death                                                                | 10.43       | 0        |
| 56                                                     | LOC342865   | XM_292785    | similar to contains transmembrane (TM) region                                                | 10.35       | 0        |
| 57                                                     | THSD6       | NM_213604    | thrombospondin, type I domain containing 6                                                   | 10.19       | 0        |
| 58                                                     | TJP2        | NM_201629    | similar to adenylate kinase 3 alpha like                                                     | 10.12       | 0        |
| 59                                                     | DSCR3       | NM_006052    | Down syndrome critical region gene 3                                                         | 9.96        | 0        |
| 60                                                     | CASP7       | NM_033340    | caspase 7, apoptosis-related cysteine protease                                               | 9.71        | 0        |
| 61                                                     | C20orf166   | NM_178463    | chromosome 20 open reading frame 166                                                         | 9.6         | 0        |
| 62                                                     | BUB3        | NM_004725    | BUB3 budding uninhibited by benzimidazoles 3 homolog (yeast)                                 | 9.44        | 0        |
| 63                                                     | LOC388122   | XM_370865    | similar to Laminin receptor 1                                                                | 9.35        | 0        |
| 64                                                     | LOC391269   | XM_372876    | similar to hypothetical protein DKFZp434A171                                                 | 9.34        | 0        |
| 65                                                     | TUSC4/NPR2L | NM_006545    | tumor suppressor candidate 4                                                                 | 9.09        | 0        |
| 66                                                     | ZNF444      | NM_018337    | zinc finger protein 444                                                                      | 9.02        | 0        |
| 67                                                     | MAP2K7      | NM_145185    | mitogen-activated protein kinase kinase 7                                                    | 9.02        | 0        |
| 68                                                     | MTRF1       | NM_004294    | mitochondrial translational release factor 1                                                 | 8.96        | 0        |
| 69                                                     | MDM2        | NM_002392    | Mdm2, transformed 3T3 cell double minute 2, p53 binding protein (mouse)                      | 8.85        | 0        |
| 70                                                     | PDCD10      | NM_007217    | programmed cell death 10                                                                     | 8.82        | 0        |
| 71                                                     | C14orf133   | NM_022067    | chromosome 14 open reading frame 133                                                         | 8.71        | 0        |
| 72                                                     | XKR4        | NM_052898    | X Kell blood group precursor-related family, member 4                                        | 8.68        | 0        |
| 73                                                     | SC4MOL      | NM_006745    | sterol-C4-methyl oxidase-like                                                                | 8.64        | 0        |
| 74                                                     | C6orf69     | NM_173562    | chromosome 6 open reading frame 69                                                           | 8.5         | 0        |
| 75                                                     | KBTBD6      | NM_152903    | kelch repeat and BTB (POZ) domain containing 6                                               | 8.48        | 0        |
| 76                                                     | AOX1        | NM_153042    | amine oxidase (flavin containing) domain 1                                                   | 8.48        | 0        |
| 77                                                     | TPMT        | NM_000367    | thiopurine S-methyltransferase                                                               | 8.48        | 0        |
| 78                                                     | SRI         | NM_198901    | sorcin                                                                                       | 8.42        | 0        |
| 79                                                     | ZFPM1       | NM_153813    | zinc finger protein, multitype 1                                                             | 8.39        | 0        |
| 80                                                     | MOGAT1      | NM_058165    | monoacylglycerol O-acyltransferase 1                                                         | 8.34        | 0        |
| 81                                                     | LOC388481   | XM_373780    | LOC388481                                                                                    | 8.32        | 0        |
| 82                                                     | NETO1       | NM_138966    | neuropilin (NRP) and tollid (TLL)-like 1                                                     | 8.32        | 0        |
| 83                                                     | USP5        | NM_003481    | ubiquitin specific protease 5 (isopeptidase T)                                               | 8.31        | 0        |
| 84                                                     | GSK3B       | NM_002093    | glycogen synthase kinase 3 beta                                                              | 8.24        | 0        |
| 85                                                     | KIAA0664    | NM_015229    | KIAA0664 protein                                                                             | 8.02        | 0        |
| 86                                                     | MAN1A1      | NM_005907    | mannosidase, alpha, class 1A, member 1                                                       | 7.98        | 0        |
| 87                                                     | CRKL        | NM_005207    | v-crk sarcoma virus CT10 oncogene homolog (avian)-like                                       | 7.88        | 0        |
| 88                                                     | C9orf103    | NM_001001551 | chromosome 9 open reading frame 103                                                          | 7.74        | 0        |

|     |           |              |                                                                                           |      |          |
|-----|-----------|--------------|-------------------------------------------------------------------------------------------|------|----------|
| 89  | AMZ1      | NM_133463    | archaemetzincin-1                                                                         | 7.72 | 0        |
| 90  | LOC388893 | XM_373954    | LOC388893                                                                                 | 7.67 | 0        |
| 91  | SAP30     | NM_003864    | sin3-associated polypeptide, 30kDa                                                        | 7.65 | 0        |
| 92  | STCH      | NM_006948    | stress 70 protein chaperone, microsome-associated, 60kDa                                  | 7.57 | 0        |
| 93  | AHSA1     | NM_012111    | AHA1, activator of heat shock 90kDa protein ATPase homolog 1 (yeast)                      | 7.55 | 0        |
| 94  | C2orf13   | NM_173545    | chromosome 2 open reading frame 13                                                        | 7.48 | 0        |
| 95  | LOC554251 | NM_001024680 | hypothetical protein LOC554251                                                            | 7.48 | 0        |
| 96  | CBX3      | NM_007276    | chromobox homolog 3 (HP1 gamma homolog, Drosophila)                                       | 7.45 | 0        |
| 97  | OR2W3     | NM_001001957 | olfactory receptor, family 2, subfamily W, member 3                                       | 7.45 | 0        |
| 98  | GTF2I     | NM_001518    | general transcription factor II, I                                                        | 7.43 | 0        |
| 99  | PEMT      | NM_148172    | phosphatidylethanolamine N-methyltransferase                                              | 7.42 | 0        |
| 100 | DDX23     | NM_004818    | DEAD (Asp-Glu-Ala-Asp) box polypeptide 23                                                 | 7.29 | 0        |
| 101 | MGC12965  | NM_198519    | similar to Cytochrome c, somatic                                                          | 7.29 | 0        |
| 102 | LOC391306 | XM_372894    | similar to Hypothetical protein DJ1198H6.2                                                | 7.29 | 0        |
| 103 | MBD6      | NM_052897    | methyl-CpG binding domain protein 6                                                       | 7.26 | 0        |
| 104 | KRTAP18-6 | NM_198688    | keratin associated protein 18-6                                                           | 7.23 | 0        |
| 105 | CYP1B1    | NM_000104    | cytochrome P450, family 1, subfamily B, polypeptide 1                                     | 7.19 | 0        |
| 106 | LOC283932 | NM_175901    | hypothetical protein LOC283932                                                            | 7.18 | 0        |
| 107 | DNAJC17   | NM_018163    | DnaJ (Hsp40) homolog, subfamily C, member 17                                              | 7.12 | 0        |
| 108 | TRAML1    | NM_152402    | translocation associated membrane protein 1-like 1                                        | 7.08 | 0        |
| 109 | MCP       | NM_002389    | membrane cofactor protein (CD46, trophoblast-lymphocyte cross-reactive antigen)           | 7.03 | 0        |
| 110 | KEAP1     | NM_012289    | kelch-like ECH-associated protein 1                                                       | 6.99 | 0        |
| 111 | PRDX6     | NM_004905    | peroxiredoxin 6                                                                           | 6.93 | 0        |
| 112 | LRRC22    | NM_001017924 | leucine rich repeat containing 22                                                         | 6.92 | 0        |
| 113 | TIPARP    | NM_015508    | TCDD-inducible poly(ADP-ribose) polymerase                                                | 6.91 | 0        |
| 114 | TSC2D3    | NM_198057    | TSC22 domain family, member 3                                                             | 6.89 | 0        |
| 115 | MITF      | NM_198159    | microphthalmia-associated transcription factor                                            | 6.88 | 0        |
| 116 | LOC392426 | XM_373339    | similar to Nucleolar phosphoprotein p130 (Nucleolar 130 kDa protein) (140 kDa nucleolar p | 6.87 | 0        |
| 117 | RAB7L1    | NM_003929    | RAB7, member RAS oncogene family-like 1                                                   | 6.83 | 0        |
| 118 | IL17RB    | NM_018725    | interleukin 17 receptor B                                                                 | 6.74 | 0        |
| 119 | CHDH      | NM_018397    | choline dehydrogenase                                                                     | 6.74 | 0        |
| 120 | WDTC1     | NM_015023    | WD and tetratricopeptide repeats 1                                                        | 6.73 | 0        |
| 121 | GTPBP2    | NM_019096    | GTP binding protein 2                                                                     | 6.71 | 0        |
| 122 | MAD2L1BP  | NM_014628    | MAD2L1 binding protein                                                                    | 6.71 | 0        |
| 123 | C6orf213  | NM_001010852 | chromosome 6 open reading frame 213                                                       | 6.67 | 0        |
| 124 | CHMP4B    | NM_176812    | chromatin modifying protein 4B                                                            | 6.65 | 0        |
| 125 | RNF14     | NM_183399    | ring finger protein 14                                                                    | 6.63 | 0        |
| 126 | LOC387725 | AK097584     | Homo sapiens hypothetical gene supported by AK097584 (LOC387725),                         | 6.54 | 0        |
| 127 | PRUNE     | NM_021222    | prune homolog (Drosophila)                                                                | 6.53 | 0        |
| 128 | SLC7A2    | NM_003046    | solute carrier family 7 (cationic amino acid transporter, y+ system), member 2            | 6.51 | 0        |
| 129 | C1QTNF6   | NM_031910    | C1q and tumor necrosis factor related protein 6                                           | 6.51 | 0        |
| 130 | ZNF189    | NM_003452    | zinc finger protein 189                                                                   | 6.5  | 0        |
| 131 | FLJ20097  | NM_024553    | hypothetical protein FLJ20097                                                             | 6.5  | 0        |
| 132 | MRPL50    | NM_019051    | mitochondrial ribosomal protein L50                                                       | 6.5  | 0        |
| 133 | LOC391130 | XM_372803    | similar to ribosomal protein S17                                                          | 6.49 | 0        |
| 134 | FBXW11    | NM_033645    | F-box and WD-40 domain protein 11                                                         | 6.45 | 0        |
| 135 | EBAG9     | NM_004215    | estrogen receptor binding site associated, antigen, 9                                     | 6.41 | 0        |
| 136 | OR10A3    | NM_001003745 | olfactory receptor, family 10, subfamily A, member 3                                      | 6.36 | 0        |
| 137 | LOC390999 | XM_372760    | similar to Hypothetical protein DJ1198H6.2                                                | 6.34 | 0        |
| 138 | CRTC2     | NM_181715    | CREB regulated transcription coactivator 2                                                | 6.33 | 0        |
| 139 | LOC390794 | XM_372672    | Homo sapiens similar to keratin associated protein 4-12; keratin                          | 6.32 | 0        |
| 140 | NTAN1     | NM_173474    | N-terminal asparagine amidase                                                             | 6.31 | 0        |
| 141 | TRA1      | NM_003299    | tumor rejection antigen (gp96) 1                                                          | 6.24 | 0        |
| 142 | SEC31L1   | NM_016211    | SEC31-like 1 (S. cerevisiae)                                                              | 6.24 | 0        |
| 143 | IL20      | NM_018724    | interleukin 20                                                                            | 6.23 | 0        |
| 144 | LOC390945 | XM_372735    | similar to paraneoplastic neuronal antigen MM2                                            | 6.23 | 0        |
| 145 | AMOTL2    | NM_016201    | angiominin like 2                                                                         | 6.22 | 0        |
| 146 | SFRS1     | NM_006924    | splicing factor, arginine/serine-rich 1 (splicing factor 2, alternate splicing factor)    | 6.19 | 0        |
| 147 | LOC392208 | XM_373246    | similar to Ac2-210                                                                        | 6.15 | 0        |
| 148 | LOC391341 | XM_372909    | Homo sapiens similar to MGC52679 protein (LOC391341), mRNA.                               | 6.14 | 0        |
| 149 | CDC42BPA  | NM_003607    | CDC42 binding protein kinase alpha (DMPK-like)                                            | 6.11 | 0        |
| 150 | TTC9      | XM_027236    | tetratricopeptide repeat domain 9                                                         | 6.02 | 0        |
| 151 | PTMA      | NM_002823    | prothymosin, alpha (gene sequence 28)                                                     | 6.01 | 0        |
| 152 | C9orf5    | NM_032012    | chromosome 9 open reading frame 5                                                         | 5.97 | 0        |
| 153 | GSPT1     | NM_002094    | G1 to S phase transition 1                                                                | 5.96 | 0        |
| 154 | CLASP2    | NM_015097    | cytoplasmic linker associated protein 2                                                   | 5.96 | 0        |
| 155 | SHARPIN   | NM_030974    | SHANK-associated RH domain interactor                                                     | 5.95 | 0        |
| 156 | C21orf13  | NM_152505    | chromosome 21 open reading frame 13                                                       | 5.93 | 0        |
| 157 | INVS      | NM_014425    | inversin                                                                                  | 5.92 | 0        |
| 158 | HMG4L     | NM_178467    | high-mobility group (nonhistone chromosomal) protein 4-like                               | 5.92 | 0        |
| 159 | TXNDC4    | NM_015051    | thioredoxin domain containing 4 (endoplasmic reticulum)                                   | 5.92 | 0        |
| 160 | FLJ20105  | NM_017669    | hypothetical protein FLJ20105                                                             | 5.87 | 0.000002 |
| 161 | VAPA      | NM_003574    | VAMP (vesicle-associated membrane protein)-associated protein A, 33kDa                    | 5.87 | 0        |
| 162 | TU12B1-TY | NM_016575    | TU12B1-TY protein                                                                         | 5.86 | 0        |
| 163 | STC2      | NM_003714    | stanniocalcin 2                                                                           | 5.86 | 0        |
| 164 | PRPF31    | NM_015629    | PRPF31 pre-mRNA processing factor 31 homolog (yeast)                                      | 5.85 | 0        |
| 165 | TFPT      | NM_013342    | TCF3 (E2A) fusion partner (in childhood Leukemia)                                         | 5.85 | 0        |
| 166 | NEDD4L    | NM_015277    | neural precursor cell expressed, developmentally down-regulated 4-like                    | 5.84 | 0        |
| 167 | ACTR1A    | NM_005736    | ARP1 actin-related protein 1 homolog A, contractin alpha (yeast)                          | 5.82 | 0        |
| 168 | BTRC      | NM_003939    | beta-transducin repeat containing                                                         | 5.81 | 0        |
| 169 | BCL3      | NM_005178    | B-cell CLL/lymphoma 3                                                                     | 5.8  | 0.000001 |
| 170 | LOC284527 | XM_211509    | hypothetical gene supported by BC016972                                                   | 5.79 | 0        |
| 171 | SEL1L     | NM_005065    | sel-1 suppressor of lin-12-like (C. elegans)                                              | 5.78 | 0        |
| 172 | ZNF337    | NM_015655    | zinc finger protein 337                                                                   | 5.72 | 0        |
| 173 | SF4       | NM_021164    | splicing factor 4                                                                         | 5.71 | 0        |
| 174 | SF4       | NM_021164    | splicing factor 4                                                                         | 5.7  | 0        |
| 175 | NCLN      | NM_020170    | nicalin homolog (zebrafish)                                                               | 5.68 | 0        |
| 176 | PDZK1     | NM_002614    | PDZ domain containing 1                                                                   | 5.67 | 0        |
| 177 | TRAF7     | NM_032271    | TNF receptor-associated factor 7                                                          | 5.64 | 0        |
| 178 | CSS3      | NM_175856    | chondroitin sulfate synthase 3                                                            | 5.64 | 0        |
| 179 | MAP3K4    | NM_005922    | mitogen-activated protein kinase kinase kinase 4                                          | 5.61 | 0.000007 |
| 180 | NEDD8     | NM_006156    | neural precursor cell expressed, developmentally down-regulated 8                         | 5.61 | 0        |
| 181 | ARID4B    | NM_016374    | AT rich interactive domain 4B (RBP1-like)                                                 | 5.6  | 0        |

|     |           |              |                                                                                              |      |          |
|-----|-----------|--------------|----------------------------------------------------------------------------------------------|------|----------|
| 182 | LOC220061 | XM_169227    | similar to proline rich antigen 2                                                            | 5.58 | 0        |
| 183 | LTA4H     | NM_000895    | leukotriene A4 hydrolase                                                                     | 5.56 | 0.000001 |
| 184 | DYNC1H2   | NM_001378    | dynein, cytoplasmic, intermediate polypeptide 2                                              | 5.56 | 0        |
| 185 | OR8B12    | NM_001005195 | olfactory receptor, family 8, subfamily B, member 12                                         | 5.56 | 0        |
| 186 | LOC390353 | XM_372474    | similar to ribosomal protein L9                                                              | 5.55 | 0        |
| 187 | LOC343384 | XM_291544    | similar to peptidyl-Pro cis trans isomerase                                                  | 5.54 | 0        |
| 188 | ZNF140    | NM_003440    | zinc finger protein 140 (clone pHZ-39)                                                       | 5.52 | 0        |
| 189 | LOC283034 | XM_210860    | hypothetical LOC283034                                                                       | 5.51 | 0        |
| 190 | SOLH      | NM_005632    | small optic lobes homolog (Drosophila)                                                       | 5.48 | 0        |
| 191 | QTRTD1    | NM_024638    | queuine tRNA-ribosyltransferase domain containing 1                                          | 5.48 | 0        |
| 192 | KIAA1005  | NM_015272    | KIAA1005 protein                                                                             | 5.48 | 0        |
| 193 | KIAA1407  | NM_020817    | KIAA1407                                                                                     | 5.48 | 0        |
| 194 | TJP1      | NM_003257    | tight junction protein 1 (zona occludens 1)                                                  | 5.46 | 0        |
| 195 | PHF21A    | NM_016621    | PHD finger protein 21A                                                                       | 5.46 | 0        |
| 196 | LOC133619 | NM_130809    | hypothetical protein MGC12103                                                                | 5.44 | 0        |
| 197 | LOC391021 | XM_372771    | similar to secreted acid phosphatase 2 (SAP2)                                                | 5.44 | 0        |
| 198 | WBP2      | NM_012478    | WW domain binding protein 2                                                                  | 5.4  | 0        |
| 199 | SCNM1     | NM_024041    | sodium channel modifier 1                                                                    | 5.4  | 0        |
| 200 | LYSMD1    | NM_212551    | LysM, putative peptidoglycan-binding, domain containing 1                                    | 5.4  | 0        |
| 201 | BAT4      | NM_033177    | HLA-B associated transcript 4                                                                | 5.38 | 0.000003 |
| 202 | CSNK2B    | NM_001320    | casein kinase 2, beta polypeptide                                                            | 5.38 | 0.000003 |
| 203 | CLPB      | NM_030813    | ClpB caseinolytic peptidase B homolog (E. coli)                                              | 5.38 | 0        |
| 204 | HBP1      | NM_012257    | HMG-box transcription factor 1                                                               | 5.37 | 0        |
| 205 | C1orf162  | NM_174896    | chromosome 1 open reading frame 162                                                          | 5.36 | 0        |
| 206 | SCDR10    | NM_198533    | short-chain dehydrogenase/reductase 10                                                       | 5.36 | 0        |
| 207 | FAM96A    | NM_032231    | family with sequence similarity 96, member A                                                 | 5.35 | 0.000001 |
| 208 | CYP4F11   | NM_021187    | cytochrome P450, family 4, subfamily F, polypeptide 11                                       | 5.3  | 0        |
| 209 | UCRC      | NM_013387    | ubiquinol-cytochrome c reductase complex (7.2 kD)                                            | 5.3  | 0        |
| 210 | PHF23     | NM_024297    | PHD finger protein 23                                                                        | 5.29 | 0        |
| 211 | LOC391030 | XM_372777    | similar to forkhead box protein O6                                                           | 5.27 | 0        |
| 212 | LOC387882 | NM_207376    | hypothetical protein                                                                         | 5.25 | 0        |
| 213 | FUK       | NM_145059    | fucokinase                                                                                   | 5.24 | 0        |
| 214 | LOC151261 | XM_098030    | hypothetical LOC151261                                                                       | 5.2  | 0        |
| 215 | LOC390570 | XM_372566    | similar to GLP_457_13116_11626                                                               | 5.19 | 0        |
| 216 | RIC8B     | NM_018157    | resistance to inhibitors of cholinesterase 8 homolog B (C. elegans)                          | 5.18 | 0        |
| 217 | RALBP1    | NM_006788    | ralA binding protein 1                                                                       | 5.17 | 0        |
| 218 | PKIB      | NM_032471    | protein kinase (cAMP-dependent, catalytic) inhibitor beta                                    | 5.17 | 0        |
| 219 | SMARCAL1  | NM_014140    | SWI/SNF related, matrix associated, actin dependent regulator of chromatin, subfamily a-like | 5.16 | 0        |
| 220 | ADORA1    | NM_000674    | adenosine A1 receptor                                                                        | 5.13 | 0.000001 |
| 221 | _ZC3H5    | XM_036115    | zinc finger CCCH type domain containing 5                                                    | 5.13 | 0        |
| 222 | C13orf21  | XM_370724    | chromosome 13 open reading frame 21                                                          | 5.13 | 0        |
| 223 | TTC13     | NM_024525    | tetratricopeptide repeat domain 13                                                           | 5.12 | 0.000001 |
| 224 | ARV1      | NM_022786    | ARV1 homolog (yeast)                                                                         | 5.12 | 0.000001 |
| 225 | PAFAH2    | NM_000437    | platelet-activating factor acetylhydrolase 2, 40kDa                                          | 5.12 | 0        |
| 226 | LOC116123 | NM_138784    | hypothetical protein BC014341                                                                | 5.12 | 0        |
| 227 | CDC14A    | NM_003672    | CDC14 cell division cycle 14 homolog A (S. cerevisiae)                                       | 5.09 | 0        |
| 228 | HK1       | NM_033496    | hexokinase 1                                                                                 | 5.09 | 0        |
| 229 | FLJ16518  | XM_372199    | FLJ16518 protein                                                                             | 5.08 | 0        |
| 230 | ING3      | NM_019071    | inhibitor of growth family, member 3                                                         | 5.07 | 0        |
| 231 | HSF2BP    | NM_007031    | heat shock transcription factor 2 binding protein                                            | 5.05 | 0.000027 |
| 232 | NUDCD1    | NM_032869    | NudC domain containing 1                                                                     | 5.05 | 0        |
| 233 | OSRF      | NM_012382    | osmosis responsive factor                                                                    | 5.03 | 0        |
| 234 | XPO7      | NM_015024    | exportin 7                                                                                   | 5.02 | 0        |
| 235 | LOC391538 | XM_372990    | Homo sapiens similar to fructose-1,6-bisphosphate aldolase A                                 | 5    | 0        |
| 236 | TMEM48    | NM_018087    | transmembrane protein 48                                                                     | 4.98 | 0.000031 |
| 237 | LOC375583 | XM_353426    | Homo sapiens LOC375583 (LOC375583), mRNA.                                                    | 4.98 | 0        |
| 238 | DMWD      | NM_004943    | Homo sapiens dystrophia myotonica-containing WD repeat motif                                 | 4.97 | 0        |
| 239 | ZNF354B   | NM_058230    | zinc finger protein 354B                                                                     | 4.96 | 0        |
| 240 | FLJ22955  | NM_024819    | hypothetical protein FLJ22955                                                                | 4.93 | 0.000023 |
| 241 | NMT1      | NM_021079    | N-myristoyltransferase 1                                                                     | 4.93 | 0.000023 |
| 242 | AP2M1     | NM_004068    | adaptor-related protein complex 2, mu 1 subunit                                              | 4.91 | 0        |
| 243 | LOC456454 | XM_513047    | similar to KIAA1026 protein                                                                  | 4.91 | 0        |
| 244 | RPL18A    | NM_000980    | ribosomal protein L18a                                                                       | 4.9  | 0        |
| 245 | TIMM22    | NM_013337    | translocase of inner mitochondrial membrane 22 homolog (yeast)                               | 4.88 | 0        |
| 246 | DHX57     | NM_198963    | DEAH (Asp-Glu-Ala-Asp/His) box polypeptide 57                                                | 4.86 | 0        |
| 247 | YKT6      | NM_006555    | SNARE protein Ykt6                                                                           | 4.85 | 0        |
| 248 | AGR2      | NM_006408    | anterior gradient 2 homolog (Xenopus laevis)                                                 | 4.85 | 0        |
| 249 | Cep290    | NM_025114    | centrosome protein cep290                                                                    | 4.83 | 0        |
| 250 | SMILE     | NM_181783    | SMILE protein                                                                                | 4.83 | 0        |
| 251 | FLJ21742  | NM_032207    | hypothetical protein FLJ21742                                                                | 4.82 | 0        |
| 252 | CALR3     | NM_145046    | calreticulin 3                                                                               | 4.82 | 0        |
| 253 | PHB       | NM_002634    | prohibitin                                                                                   | 4.79 | 0        |
| 254 | ZNF331    | NM_018555    | zinc finger protein 331                                                                      | 4.77 | 0.000001 |
| 255 | ANXA6     | NM_001155    | annexin A6                                                                                   | 4.74 | 0        |
| 256 | MDS025    | NM_021825    | hypothetical protein MDS025                                                                  | 4.71 | 0.000003 |
| 257 | ZFYVE1    | NM_021260    | zinc finger, FYVE domain containing 1                                                        | 4.7  | 0        |
| 258 | MGRN1     | NM_015246    | mahogunin, ring finger 1                                                                     | 4.69 | 0        |
| 259 | PPP1R12C  | NM_017607    | protein phosphatase 1, regulatory (inhibitor) subunit 12C                                    | 4.66 | 0.000003 |
| 260 | BRMS1L    | NM_032352    | breast cancer metastasis-suppressor 1-like                                                   | 4.65 | 0        |
| 261 | FLJ21272  | AK024925     | Homo sapiens hypothetical protein FLJ21272 (FLJ21272), mRNA.                                 | 4.64 | 0.000028 |
| 262 | MGP       | NM_000900    | matrix Gla protein                                                                           | 4.64 | 0.000002 |
| 263 | INPP4B    | NM_003866    | inositol polyphosphate-4-phosphatase, type II, 105kDa                                        | 4.64 | 0.000001 |
| 264 | MYOT      | NM_006790    | myotilin                                                                                     | 4.63 | 0.000001 |
| 265 | PTP4A2    | NM_003479    | protein tyrosine phosphatase type IVA, member 2                                              | 4.63 | 0        |
| 266 | FAM63A    | NM_018379    | family with sequence similarity 63, member A                                                 | 4.57 | 0.000024 |
| 267 | ATBF1     | NM_006885    | AT-binding transcription factor 1                                                            | 4.57 | 0.000008 |
| 268 | RBL1      | NM_002895    | retinoblastoma-like 1 (p107)                                                                 | 4.56 | 0        |
| 269 | CUGBP1    | NM_198700    | CUG triplet repeat, RNA binding protein 1                                                    | 4.54 | 0        |
| 270 | SRRM2     | NM_016333    | serine/arginine repetitive matrix 2                                                          | 4.54 | 0        |
| 271 | LOC391322 | XM_372900    | similar to D-dopachrome tautomerase (Phenylpyruvate tautomerase II)                          | 4.53 | 0.000001 |
| 272 | LOC390920 | XM_372724    | similar to Zinc finger protein 132                                                           | 4.53 | 0.000001 |
| 273 | PES1      | NM_014303    | pescadillo homolog 1, containing BRCT domain (zebrafish)                                     | 4.53 | 0        |
| 274 | C21orf122 | BC004343     | Homo sapiens chromosome 21 open reading frame 122 (C21orf122),                               | 4.51 | 0        |

|     |           |              |                                                                             |      |          |
|-----|-----------|--------------|-----------------------------------------------------------------------------|------|----------|
| 275 | ZMAT5     | NM_019103    | zinc finger, matrin type 5                                                  | 4.5  | 0        |
| 276 | THRFP3    | NM_005119    | thyroid hormone receptor associated protein 3                               | 4.49 | 0.000001 |
| 277 | LOC387861 | XM_370695    | similar to K+ channel tetramerization protein                               | 4.48 | 0.000003 |
| 278 | VCIP1     | NM_025054    | valosin-containing protein (p97)/p47 complex-interacting protein p135       | 4.48 | 0        |
| 279 | VRK3      | NM_016440    | vaccinia related kinase 3                                                   | 4.48 | 0        |
| 280 | ZNF473    | NM_015428    | zinc finger protein 473                                                     | 4.48 | 0        |
| 281 | LOC391161 | XM_372811    | similar to ribosomal protein L31                                            | 4.48 | 0        |
| 282 | HBXAP     | NM_016578    | hepatitis B virus x associated protein                                      | 4.47 | 0.000001 |
| 283 | C11orf30  | NM_020193    | chromosome 11 open reading frame 30                                         | 4.46 | 0        |
| 284 | ZNRF1     | NM_032268    | zinc and ring finger protein 1                                              | 4.45 | 0        |
| 285 | NAALADL2  | NM_207015    | N-acetylated alpha-linked acidic dipeptidase-like 2                         | 4.45 | 0        |
| 286 | RIPK5     | NM_015375    | receptor interacting protein kinase 5                                       | 4.42 | 0.000002 |
| 287 | TMEM4     | NM_014255    | transmembrane protein 4                                                     | 4.41 | 0.000002 |
| 288 | FEM1A     | NM_018708    | fem-1 homolog a (C.elegans)                                                 | 4.41 | 0.000002 |
| 289 | FLJ34043  | XM_085830    | hypothetical LOC147649                                                      | 4.39 | 0        |
| 290 | PPP1R12B  | NM_002481    | protein phosphatase 1, regulatory (inhibitor) subunit 12B                   | 4.38 | 0.000002 |
| 291 | C10orf9   | NM_181698    | chromosome 10 open reading frame 9                                          | 4.36 | 0.000001 |
| 292 | PTD015    | NM_024684    | PTD015 protein                                                              | 4.36 | 0        |
| 293 | BACH2     | NM_021813    | BTB and CNC homology 1, basic leucine zipper transcription factor 2         | 4.35 | 0        |
| 294 | SPTBN4    | NM_020971    | spectrin, beta, non-erythrocytic 4                                          | 4.33 | 0        |
| 295 | TSSC4     | NM_005706    | tumor suppressing subtransferable candidate 4                               | 4.31 | 0        |
| 296 | UBADC1    | NM_016172    | ubiquitin associated domain containing 1                                    | 4.31 | 0        |
| 297 | CDK5      | NM_004935    | cyclin-dependent kinase 5                                                   | 4.29 | 0.00005  |
| 298 | SPINK2    | NM_021114    | serine protease inhibitor, Kazal type 2 (acrosin-trypsin inhibitor)         | 4.28 | 0.000003 |
| 299 | MGC11242  | NM_024320    | hypothetical protein MGC11242                                               | 4.28 | 0.000001 |
| 300 | WWP1      | NM_007013    | WW domain-containing protein 1                                              | 4.26 | 0        |
| 301 | ANKRD2    | NM_020349    | ankyrin repeat domain 2 (stretch responsive muscle)                         | 4.26 | 0        |
| 302 | ESCO2     | NM_001017420 | establishment of cohesion 1 homolog 2 (S. cerevisiae)                       | 4.24 | 0.000019 |
| 303 | CYP3A43   | NM_022820    | cytochrome P450, family 3, subfamily A, polypeptide 43                      | 4.24 | 0.000002 |
| 304 | GMPR2     | NM_016576    | guanosine monophosphate reductase 2                                         | 4.24 | 0.000001 |
| 305 | LOC392467 | XM_373349    | similar to melanoma antigen, family B, 4; melanoma-associated antigen B4    | 4.24 | 0        |
| 306 | SLITL2    | NM_138440    | slit-like 2 (Drosophila)                                                    | 4.23 | 0        |
| 307 | SLC26A1   | NM_022042    | solute carrier family 26 (sulfate transporter), member 1                    | 4.23 | 0        |
| 308 | PABPC1    | NM_002568    | poly(A) binding protein, cytoplasmic 1                                      | 4.22 | 0.000002 |
| 309 | EFCAB2    | NM_032328    | EF-hand calcium binding domain 2                                            | 4.21 | 0.000002 |
| 310 | CHCHD3    | NM_017812    | coiled-coil-helix-coiled-coil-helix domain containing 3                     | 4.19 | 0        |
| 311 | FOXA1     | NM_004496    | forkhead box A1                                                             | 4.19 | 0        |
| 312 | CAST      | NM_173060    | calpastatin                                                                 | 4.16 | 0        |
| 313 | LENG5     | NM_024298    | leukocyte receptor cluster (LRC) member 5                                   | 4.15 | 0        |
| 314 | BLVRB     | NM_000713    | biliverdin reductase B (flavin reductase (NADPH))                           | 4.15 | 0        |
| 315 | TSEN34    | NM_024075    | tRNA splicing endonuclease 34 homolog (SEN34, S. cerevisiae)                | 4.15 | 0        |
| 316 | OR5AC2    | NM_054106    | olfactory receptor, family 5, subfamily AC, member 2                        | 4.14 | 0        |
| 317 | LOC152098 | XM_087384    | hypothetical protein LOC152098                                              | 4.13 | 0.000003 |
| 318 | SUV420H1  | NM_016028    | suppressor of variegation 4-20 homolog 1 (Drosophila)                       | 4.12 | 0.000001 |
| 319 | CAND1     | NM_018448    | cullin-associated and neddylation-dissociated 1                             | 4.11 | 0.000017 |
| 320 | ARL6IP2   | NM_022374    | ADP-ribosylation factor-like 6 interacting protein 2                        | 4.11 | 0.000005 |
| 321 | ZNF527    | XM_030378    | zinc finger protein 527                                                     | 4.11 | 0.000003 |
| 322 | KIDINS220 | NM_020738    | likely homolog of rat kinase D-interacting substance of 220 kDa             | 4.11 | 0        |
| 323 | PCYT1A    | NM_005017    | phosphate cytidylyltransferase 1, choline, alpha isoform                    | 4.09 | 0        |
| 324 | SR-A1     | NM_021228    | serine arginine-rich pre-mRNA splicing factor SR-A1                         | 4.08 | 0.000004 |
| 325 | C10orf99  | XM_370566    | chromosome 10 open reading frame 99                                         | 4.08 | 0        |
| 326 | LOC387736 | XM_373483    | LOC387736                                                                   | 4.07 | 0        |
| 327 | BRI3BP    | NM_080626    | BRI3 binding protein                                                        | 4.06 | 0.000002 |
| 328 | TBL1XR1   | NM_024665    | transducin (beta)-like 1X-linked receptor 1                                 | 4.06 | 0        |
| 329 | FLJ21901  | NM_024622    | hypothetical protein FLJ21901                                               | 4.05 | 0.000002 |
| 330 | C14orf145 | NM_177527    | Homo sapiens chromosome 14 open reading frame 61 (C14orf61), mRNA.          | 4.05 | 0        |
| 331 | LOC90353  | NM_145232    | LOC90353                                                                    | 4.04 | 0        |
| 332 | LOC133993 | XM_068632    | similar to hypothetical protein MGC52498                                    | 4.04 | 0        |
| 333 | WRNIP1    | NM_020135    | Werner helicase interacting protein 1                                       | 4.03 | 0        |
| 334 | KBTBD7    | NM_032138    | kelch repeat and BTB (POZ) domain containing 7                              | 4    | 0.000008 |
| 335 | C18orf17  | NM_153211    | chromosome 18 open reading frame 17                                         | 3.99 | 0        |
| 336 | LOC90485  | XM_032059    | similar to BC37295_3                                                        | 3.99 | 0        |
| 337 | FBXO15    | NM_152676    | F-box protein 15                                                            | 3.98 | 0.000002 |
| 338 | MGC34646  | NM_173519    | hypothetical protein MGC34646                                               | 3.97 | 0        |
| 339 | LOC388005 | XM_370771    | Homo sapiens similar to RIKEN cDNA 0610010D24 (LOC388005), mRNA.            | 3.96 | 0        |
| 340 | LOC119710 | NM_138787    | hypothetical protein BC009561                                               | 3.94 | 0.000013 |
| 341 | NR1D1     | NM_021724    | nuclear receptor subfamily 1, group D, member 1                             | 3.94 | 0        |
| 342 | EPS8      | NM_004447    | epidermal growth factor receptor pathway substrate 8                        | 3.93 | 0.000012 |
| 343 | CYB561D2  | NM_007022    | cytochrome b-561 domain containing 2                                        | 3.93 | 0        |
| 344 | LOC343705 | XM_293157    | similar to beta-galactoside alpha-2,3-sialyltransferase                     | 3.91 | 0.000001 |
| 345 | KIAA1128  | NM_018999    | KIAA1128 protein                                                            | 3.91 | 0        |
| 346 | IFRD1     | NM_001550    | interferon-related developmental regulator 1                                | 3.9  | 0.000001 |
| 347 | MRPL23    | NM_021134    | mitochondrial ribosomal protein L23                                         | 3.9  | 0        |
| 348 | TCEB1     | NM_005648    | transcription elongation factor B (SIII), polypeptide 1 (15kDa, elongin C)  | 3.89 | 0.000007 |
| 349 | KIAA1181  | NM_020462    | KIAA1181 protein                                                            | 3.88 | 0.000002 |
| 350 | TMOD3     | NM_014547    | tropomodulin 3 (ubiquitous)                                                 | 3.88 | 0.000002 |
| 351 | ABCA3     | NM_001089    | ATP-binding cassette, sub-family A (ABC1), member 3                         | 3.88 | 0.000001 |
| 352 | MNT       | NM_020310    | MAX binding protein                                                         | 3.86 | 0.000001 |
| 353 | RBED1     | NM_032213    | RNA binding motif and ELMO domain 1                                         | 3.85 | 0.000002 |
| 354 | RetSat    | NM_017750    | all-trans-13,14-dihydroretinol saturase                                     | 3.85 | 0.000002 |
| 355 | ETFDH     | NM_004453    | electron-transferring-flavoprotein dehydrogenase                            | 3.85 | 0        |
| 356 | LOC201725 | NM_001008393 | LOC201725                                                                   | 3.85 | 0        |
| 357 | FLJ20152  | NM_019000    | hypothetical protein FLJ20152                                               | 3.84 | 0.000048 |
| 358 | ZFP36     | NM_003407    | zinc finger protein 36, C3H type, homolog (mouse)                           | 3.84 | 0.000002 |
| 359 | TBX6      | NM_004608    | T-box 6                                                                     | 3.84 | 0.000001 |
| 360 | YPPEL3    | NM_031477    | yippee-like 3 (Drosophila)                                                  | 3.84 | 0.000001 |
| 361 | LOC196549 | NM_145293    | similar to hypothetical protein FLJ20897                                    | 3.83 | 0        |
| 362 | TSNARE1   | NM_145003    | t-SNARE domain containing 1                                                 | 3.82 | 0.000011 |
| 363 | SLC25A19  | NM_021734    | solute carrier family 25 (mitochondrial deoxynucleotide carrier), member 19 | 3.81 | 0.000001 |
| 364 | WNK1      | NM_018979    | WNK lysine deficient protein kinase 1                                       | 3.8  | 0.000015 |
| 365 | B3GNT1    | NM_006577    | UDP-GlcNAc:betaGal beta-1,3-N-acetylgalucosaminyltransferase 1              | 3.8  | 0.000001 |
| 366 | TGM6      | NM_198994    | transglutaminase y                                                          | 3.79 | 0        |
| 367 | LOC147975 | XM_097351    | hypothetical LOC147975                                                      | 3.79 | 0        |

|     |               |              |                                                                                        |      |          |
|-----|---------------|--------------|----------------------------------------------------------------------------------------|------|----------|
| 368 | ABCC5         | NM_005688    | ATP-binding cassette, sub-family C (CFTR/MRP), member 5                                | 3.78 | 0.000001 |
| 369 | MX1           | NM_005962    | MAX interactor 1                                                                       | 3.78 | 0.000001 |
| 370 | COL20A1       | NM_020882    | collagen, type XX, alpha 1                                                             | 3.77 | 0.000005 |
| 371 | UMODL1        | NM_173568    | uromodulin-like 1                                                                      | 3.77 | 0.000002 |
| 372 | MR-1          | NM_022572    | myofibrillogenesis regulator 1                                                         | 3.77 | 0.000001 |
| 373 | DKFZP564H122  | NM_015506    | DKFZP564H122 protein                                                                   | 3.77 | 0        |
| 374 | LOC126661     | XM_059061    | hypothetical protein LOC126661                                                         | 3.77 | 0        |
| 375 | APBA2BP       | NM_031231    | amyloid beta (A4) precursor protein-binding, family A, member 2 binding protein        | 3.75 | 0        |
| 376 | TBC1D10C      | NM_198517    | TBC1 domain family, member 10C                                                         | 3.74 | 0.000001 |
| 377 | FLJ25323      | NM_198521    | FLJ25323 protein                                                                       | 3.74 | 0.000001 |
| 378 | PEX1          | NM_000466    | peroxisome biogenesis factor 1                                                         | 3.73 | 0.000009 |
| 379 | DKFZp564O0523 | NM_032120    | DKFZp564O0523                                                                          | 3.73 | 0.000009 |
| 380 | ABLIM2        | NM_032432    | actin binding LIM protein family, member 2                                             | 3.73 | 0        |
| 381 | IRF2BP2       | NM_182972    | interferon regulatory factor 2 binding protein 2                                       | 3.73 | 0        |
| 382 | LOC387783     | XM_373505    | LOC387783                                                                              | 3.72 | 0.000002 |
| 383 | HNRPH2        | NM_019597    | heterogeneous nuclear ribonucleoprotein H2 (H')                                        | 3.72 | 0.000002 |
| 384 | GLA           | NM_000169    | galactosidase, alpha                                                                   | 3.72 | 0.000002 |
| 385 | MAPBPIP       | NM_014017    | mitogen-activated protein-binding protein-interacting protein                          | 3.71 | 0.000006 |
| 386 | CFDP1         | NM_006324    | craniofacial development protein 1                                                     | 3.68 | 0.000001 |
| 387 | PCDHGA11      | NM_018914    | protocadherin gamma subfamily A, 11                                                    | 3.68 | 0        |
| 388 | FAM13A1       | NM_014883    | family with sequence similarity 13, member A1                                          | 3.68 | 0        |
| 389 | COPE          | NM_007263    | coatamer protein complex, subunit epsilon                                              | 3.68 | 0        |
| 390 | DDX49         | NM_019070    | DEAD (Asp-Glu-Ala-Asp) box polypeptide 49                                              | 3.68 | 0        |
| 391 | SNX27         | NM_030918    | sorting nexin family member 27                                                         | 3.67 | 0.000001 |
| 392 | REXO2         | NM_015523    | REX2, RNA exonuclease 2 homolog (S. cerevisiae)                                        | 3.66 | 0.000002 |
| 393 | FCGRT         | NM_004107    | Fc fragment of IgG, receptor, transporter, alpha                                       | 3.66 | 0.000001 |
| 394 | BUB1B         | NM_001211    | BUB1 budding uninhibited by benzimidazoles 1 homolog beta (yeast)                      | 3.66 | 0.000001 |
| 395 | PL6           | NM_007024    | placental protein 6                                                                    | 3.65 | 0.000017 |
| 396 | TRIM23        | NM_001656    | tripartite motif-containing 23                                                         | 3.65 | 0.00001  |
| 397 | CDK10         | NM_003674    | cyclin-dependent kinase (CDC2-like) 10                                                 | 3.65 | 0.00001  |
| 398 | FLJ13611      | NM_024941    | FLJ13611                                                                               | 3.65 | 0.00001  |
| 399 | PGM2L1        | NM_173582    | phosphoglucomutase 2-like 1                                                            | 3.65 | 0.000003 |
| 400 | LOC391282     | XM_372878    | similar to 60S ribosomal protein L23a                                                  | 3.65 | 0.000001 |
| 401 | ITPR1         | NM_002222    | inositol 1,4,5-triphosphate receptor, type 1                                           | 3.64 | 0.000003 |
| 402 | UNQ5783       | NM_207103    | DTFT5783                                                                               | 3.64 | 0        |
| 403 | CHCHD4        | NM_144636    | coiled-coil-helix-coiled-coil-helix domain containing 4                                | 3.63 | 0.000003 |
| 404 | TMEM43        | NM_024334    | transmembrane protein 43                                                               | 3.63 | 0.000003 |
| 405 | ZNF223        | NM_013361    | zinc finger protein 223                                                                | 3.62 | 0        |
| 406 | RIPK2         | NM_003821    | receptor-interacting serine-threonine kinase 2                                         | 3.61 | 0.000005 |
| 407 | RAD21         | NM_006265    | RAD21 homolog (S. pombe)                                                               | 3.61 | 0.000001 |
| 408 | AKAP1         | NM_139275    | A kinase (PRKA) anchor protein 1                                                       | 3.61 | 0        |
| 409 | DLG5          | NM_004747    | discs, large homolog 5 (Drosophila)                                                    | 3.6  | 0.000022 |
| 410 | IGSF3         | NM_001542    | immunoglobulin superfamily, member 3                                                   | 3.6  | 0        |
| 411 | PCTP          | NM_021213    | phosphatidylcholine transfer protein                                                   | 3.57 | 0.000002 |
| 412 | TFAP2C        | NM_003222    | transcription factor AP-2 gamma (activating enhancer binding protein 2 gamma)          | 3.56 | 0.000011 |
| 413 | FAM35A        | NM_019054    | family with sequence similarity 35, member A                                           | 3.55 | 0.000007 |
| 414 | GLUD1         | NM_005271    | glutamate dehydrogenase 1                                                              | 3.55 | 0.000007 |
| 415 | PLAC1         | NM_021796    | placenta-specific 1                                                                    | 3.53 | 0.000021 |
| 416 | PANK3         | NM_024594    | pantothenate kinase 3                                                                  | 3.52 | 0.000002 |
| 417 | ALS2CR2       | NM_018571    | amyotrophic lateral sclerosis 2 (juvenile) chromosome region, candidate 2              | 3.52 | 0.000001 |
| 418 | ALS2CR3       | NM_015049    | amyotrophic lateral sclerosis 2 (juvenile) chromosome region, candidate 3              | 3.52 | 0.000001 |
| 419 | LOC90668      | NM_138360    | hypothetical protein BC008134                                                          | 3.51 | 0.000001 |
| 420 | RABAC1        | NM_006423    | Rab acceptor 1 (prenylated)                                                            | 3.51 | 0.000001 |
| 421 | SLC18A1       | NM_003053    | solute carrier family 18 (vesicular monoamine), member 1                               | 3.5  | 0.00003  |
| 422 | MGC50559      | NM_173802    | hypothetical protein MGC50559                                                          | 3.5  | 0.000007 |
| 423 | STXBP4        | NM_178509    | syntaxin binding protein 4                                                             | 3.5  | 0.000005 |
| 424 | COX11         | NM_004375    | COX11 homolog, cytochrome c oxidase assembly protein (yeast)                           | 3.5  | 0.000005 |
| 425 | AAMP          | NM_001087    | angio-associated, migratory cell protein                                               | 3.49 | 0.000004 |
| 426 | GARNL4        | NM_015085    | GTPase activating RANGAP domain-like 4                                                 | 3.47 | 0.000004 |
| 427 | SNX14         | NM_020468    | sorting nexin 14                                                                       | 3.47 | 0.000002 |
| 428 | C9orf121      | NM_145283    | chromosome 9 open reading frame 121                                                    | 3.46 | 0.000001 |
| 429 | DKFZP564D166  | XM_371074    | putative ankyrin-repeat containing protein                                             | 3.45 | 0.000005 |
| 430 | GLRX          | NM_002064    | glutaredoxin (thioltransferase)                                                        | 3.44 | 0.00004  |
| 431 | FLJ39421      | NM_178519    | hypothetical protein FLJ39421                                                          | 3.44 | 0.000003 |
| 432 | SPIRE2        | NM_032451    | spire homolog 2 (Drosophila)                                                           | 3.41 | 0.000006 |
| 433 | PCNP          | NM_020357    | PEST-containing nuclear protein                                                        | 3.41 | 0.000001 |
| 434 | HEXIM1        | NM_006460    | hexamethylene bis-acetamide inducible 1                                                | 3.4  | 0.000014 |
| 435 | RAB30         | NM_014488    | RAB30, member RAS oncogene family                                                      | 3.4  | 0.000011 |
| 436 | TPBG          | NM_006670    | trophoblast glycoprotein                                                               | 3.4  | 0        |
| 437 | UBR2          | NM_015255    | ubiquitin protein ligase E3 component n-recognin 2                                     | 3.39 | 0.000008 |
| 438 | LOC391654     | XM_373026    | similar to Hypothetical protein MGC66426                                               | 3.39 | 0.000007 |
| 439 | GGPS1         | NM_004837    | geranylgeranyl diphosphate synthase 1                                                  | 3.39 | 0.000005 |
| 440 | SEMA3B        | NM_004636    | sema domain, immunoglobulin domain (Ig), short basic domain, secreted, (semaphorin) 3B | 3.36 | 0.000041 |
| 441 | ZNF605        | NM_183238    | zinc finger protein 605                                                                | 3.36 | 0.000006 |
| 442 | FLJ30990      | NM_152517    | hypothetical protein FLJ30990                                                          | 3.36 | 0.000001 |
| 443 | TMEM30B       | NM_001017970 | transmembrane protein 30B                                                              | 3.36 | 0.000001 |
| 444 | RXRβ          | NM_021976    | retinoid X receptor, beta                                                              | 3.36 | 0.000001 |
| 445 | SLC39A7       | NM_006979    | solute carrier family 39 (zinc transporter), member 7                                  | 3.36 | 0.000001 |
| 446 | ZNF225        | NM_013362    | zinc finger protein 225                                                                | 3.35 | 0.000002 |
| 447 | ZNF571        | NM_016536    | zinc finger protein 571                                                                | 3.35 | 0.000001 |
| 448 | SPPL2A        | NM_032802    | putative intramembrane cleaving protease                                               | 3.34 | 0.000026 |
| 449 | USP31         | NM_020718    | ubiquitin specific protease 31                                                         | 3.34 | 0.000004 |
| 450 | C1orf121      | NM_016076    | chromosome 1 open reading frame 121                                                    | 3.34 | 0.000002 |
| 451 | MEN1          | NM_130800    | multiple endocrine neoplasia 1                                                         | 3.34 | 0.000001 |
| 452 | NYD-SP11      | XM_371164    | NYD-SP11 protein                                                                       | 3.33 | 0.000009 |
| 453 | SIPA1L3       | NM_015073    | signal-induced proliferation-associated 1 like 3                                       | 3.33 | 0.000009 |
| 454 | FOXC1         | NM_001453    | forkhead box C1                                                                        | 3.33 | 0.000001 |
| 455 | ZNF302        | NM_018675    | zinc finger protein 302                                                                | 3.32 | 0.000007 |
| 456 | C6orf187      | XM_166305    | Homo sapiens chromosome 6 open reading frame 187 (C6orf187), mRNA.                     | 3.32 | 0.000003 |
| 457 | LOC91801      | NM_138775    | hypothetical protein BC015183                                                          | 3.31 | 0.000012 |
| 458 | PPP2R5D       | NM_006245    | protein phosphatase 2, regulatory subunit B (B56), delta isoform                       | 3.31 | 0.000008 |
| 459 | C10orf22      | NM_032804    | chromosome 10 open reading frame 22                                                    | 3.31 | 0.000002 |
| 460 | FLJ11151      | NM_018340    | hypothetical protein FLJ11151                                                          | 3.3  | 0.000036 |

|     |               |              |                                                                                            |      |          |
|-----|---------------|--------------|--------------------------------------------------------------------------------------------|------|----------|
| 461 | C1QDC1        | NM_023925    | C1q domain containing 1                                                                    | 3.3  | 0.000001 |
| 462 | TPM3          | NM_152263    | tropomyosin 3                                                                              | 3.29 | 0.000006 |
| 463 | PIK3C2G       | NM_004570    | phosphoinositide-3-kinase, class 2, gamma polypeptide                                      | 3.27 | 0.000024 |
| 464 | PUS1          | NM_025215    | pseudouridylate synthase 1                                                                 | 3.27 | 0.000008 |
| 465 | SPIN1         | NM_032038    | spinster-like                                                                              | 3.27 | 0.000003 |
| 466 | NUDT13        | NM_015901    | nudix (nucleoside diphosphate linked moiety X)-type motif 13                               | 3.24 | 0.000008 |
| 467 | CALM2         | NM_001743    | calmodulin 2 (phosphorylase kinase, delta)                                                 | 3.23 | 0.000005 |
| 468 | CDCA3         | NM_031299    | cell division cycle associated 3                                                           | 3.22 | 0.000066 |
| 469 | ELF3          | NM_004433    | E74-like factor 3 (ets domain transcription factor, epithelial-specific)                   | 3.22 | 0.000001 |
| 470 | C14orf10      | NM_017917    | chromosome 14 open reading frame 10                                                        | 3.21 | 0.000026 |
| 471 | KIAA0391      | NM_014672    | KIAA0391                                                                                   | 3.21 | 0.000026 |
| 472 | RPS26         | NM_001029    | ribosomal protein S26                                                                      | 3.21 | 0.000018 |
| 473 | PKD2L2        | NM_014386    | polycystic kidney disease 2-like 2                                                         | 3.21 | 0.000012 |
| 474 | ZNF272        | NM_006635    | zinc finger protein 272                                                                    | 3.21 | 0.000004 |
| 475 | MLR1          | NM_153686    | transcription factor MLR1                                                                  | 3.2  | 0.000015 |
| 476 | LRMP          | NM_006152    | lymphoid-restricted membrane protein                                                       | 3.19 | 0.000002 |
| 477 | ARHGEF19      | NM_153213    | Rho guanine nucleotide exchange factor (GEF) 19                                            | 3.18 | 0.000005 |
| 478 | TGFA          | NM_003236    | transforming growth factor, alpha                                                          | 3.17 | 0.000002 |
| 479 | ADSS          | NM_001126    | adenylosuccinate synthase                                                                  | 3.15 | 0.000058 |
| 480 | LOC442528     | XM_499275    | Homo sapiens similar to retinitis pigmentosa 9 homolog; Pim-1                              | 3.15 | 0.000009 |
| 481 | B3GALNT2      | NM_152490    | UDP-GalNAc:betaGlcNAc beta 1,3-galactosaminyltransferase, polypeptide 2                    | 3.15 | 0.000006 |
| 482 | MGC13008      | BC005072     | Homo sapiens hypothetical protein MGC13008 (MGC13008), mRNA.                               | 3.14 | 0.000036 |
| 483 | MYO9B         | NM_004145    | myosin IXB                                                                                 | 3.14 | 0.000023 |
| 484 | NY-SAR-48     | NM_033417    | sarcoma antigen NY-SAR-48                                                                  | 3.14 | 0.000023 |
| 485 | HIST1H4H      | NM_003543    | histone 1, H4h                                                                             | 3.14 | 0.000019 |
| 486 | FLJ90024      | NM_153342    | fasting-inducible integral membrane protein TM6P1                                          | 3.13 | 0.000025 |
| 487 | RNF166        | NM_178841    | ring finger protein 166                                                                    | 3.13 | 0.000003 |
| 488 | LOC348180     | NM_001012759 | hypothetical protein LOC348180                                                             | 3.13 | 0.000003 |
| 489 | MASA          | NM_021204    | E-1 enzyme                                                                                 | 3.12 | 0.000003 |
| 490 | MORF4L2       | NM_012286    | mortality factor 4 like 2                                                                  | 3.12 | 0.000003 |
| 491 | HNRPDL        | NM_031372    | heterogeneous nuclear ribonucleoprotein D-like                                             | 3.12 | 0.000003 |
| 492 | UBE2V1        | NM_022442    | ubiquitin-conjugating enzyme E2 variant 1                                                  | 3.11 | 0.000013 |
| 493 | PRKCI         | NM_002740    | protein kinase C, iota                                                                     | 3.1  | 0.00005  |
| 494 | MGC2654       | NM_024109    | hypothetical protein MGC2654                                                               | 3.1  | 0.000013 |
| 495 | C14orf140     | NM_024643    | chromosome 14 open reading frame 140                                                       | 3.1  | 0.00001  |
| 496 | DNAJB11       | NM_016306    | DnaJ (Hsp40) homolog, subfamily B, member 11                                               | 3.09 | 0.00001  |
| 497 | LOC151111     | XM_087097    | hypothetical LOC151111                                                                     | 3.09 | 0.000002 |
| 498 | GTF2I         | NM_001518    | general transcription factor II, i                                                         | 3.08 | 0.000003 |
| 499 | ZNF436        | NM_030634    | zinc finger protein 436                                                                    | 3.08 | 0.000019 |
| 500 | LOC148898     | NM_138479    | hypothetical protein BC007899                                                              | 3.08 | 0.000019 |
| 501 | C18orf34      | NM_198995    | chromosome 18 open reading frame 34                                                        | 3.08 | 0.000004 |
| 502 | PHF12         | NM_020889    | PHD finger protein 12                                                                      | 3.07 | 0.000042 |
| 503 | SOD2          | NM_000636    | superoxide dismutase 2, mitochondrial                                                      | 3.07 | 0.000003 |
| 504 | GPR108        | XM_290854    | G protein-coupled receptor 108                                                             | 3.06 | 0.000038 |
| 505 | CORO2A        | NM_052820    | coronin, actin binding protein, 2A                                                         | 3.06 | 0.000006 |
| 506 | FBXO9         | NM_033481    | F-box protein 9                                                                            | 3.06 | 0.000004 |
| 507 | FBXL22        | NM_203373    | F-box and leucine-rich repeat protein 22                                                   | 3.05 | 0.000009 |
| 508 | HRB2          | NM_007043    | HIV-1 rev binding protein 2                                                                | 3.05 | 0.000003 |
| 509 | STAU          | NM_004602    | staufen, RNA binding protein (Drosophila)                                                  | 3.04 | 0.000032 |
| 510 | ZFP91         | NM_053023    | zinc finger protein 91 homolog (mouse)                                                     | 3.04 | 0.000004 |
| 511 | MLL4          | NM_014727    | myeloid/lymphoid or mixed-lineage leukemia 4                                               | 3.03 | 0.000007 |
| 512 | HNRPA1        | NM_002136    | heterogeneous nuclear ribonucleoprotein A1                                                 | 3.01 | 0.000024 |
| 513 | LOC392400     | XM_373323    | Homo sapiens similar to F4N2.10 (LOC392400), mRNA.                                         | 3.01 | 0.000004 |
| 514 | TMEM59        | NM_004872    | transmembrane protein 59                                                                   | 3    | 0.000036 |
| 515 | C1orf83       | NM_153035    | chromosome 1 open reading frame 83                                                         | 3    | 0.000036 |
| 516 | MRLC2         | NM_033546    | myosin regulatory light chain MRLC2                                                        | 3    | 0.000007 |
| 517 | HIST2H2AB     | NM_175065    | histone 2, H2ab                                                                            | 3    | 0.000006 |
| 518 | NFIC          | NM_005597    | nuclear factor I/C (CCAAT-binding transcription factor)                                    | 2.98 | 0.000014 |
| 519 | TPD52L1       | NM_003287    | tumor protein D52-like 1                                                                   | 2.98 | 0.000004 |
| 520 | FLJ36878      | NM_178518    | hypothetical protein FLJ36878                                                              | 2.97 | 0.00002  |
| 521 | CCT3          | NM_005998    | chaperonin containing TCP1, subunit 3 (gamma)                                              | 2.96 | 0.000013 |
| 522 | C1orf182      | NM_144627    | chromosome 1 open reading frame 182                                                        | 2.96 | 0.000013 |
| 523 | C1orf16       | NM_014837    | chromosome 1 open reading frame 16                                                         | 2.96 | 0.000012 |
| 524 | LOC390169     | XM_372402    | similar to olfactory receptor GA_x6K02T2Q125-47402610-47403533                             | 2.95 | 0.000024 |
| 525 | KIAA1274      | NM_014431    | paladin                                                                                    | 2.95 | 0.000005 |
| 526 | ZDHHC13       | NM_019028    | zinc finger, DHHC domain containing 13                                                     | 2.95 | 0.000003 |
| 527 | LOC388567     | XM_371200    | similar to R30217_1                                                                        | 2.94 | 0.000007 |
| 528 | CARKL         | NM_013276    | carbohydrate kinase-like                                                                   | 2.94 | 0.000005 |
| 529 | CTNS          | NM_004937    | cystinosis, nephropathic                                                                   | 2.94 | 0.000005 |
| 530 | LOC388654     | XM_371273    | similar to 40S ribosomal protein SA (P40) (34/67 kDa laminin receptor) (Colon carcinoma la | 2.93 | 0.00002  |
| 531 | GJB7          | NM_198568    | gap junction protein, beta 7                                                               | 2.93 | 0.000007 |
| 532 | ITSN2         | NM_006277    | intersectin 2                                                                              | 2.93 | 0.000004 |
| 533 | COL4A3BP      | NM_005713    | collagen, type IV, alpha 3 (Goodpasture antigen) binding protein                           | 2.91 | 0.000033 |
| 534 | POLK          | NM_016218    | polymerase (DNA directed) kappa                                                            | 2.91 | 0.000033 |
| 535 | FMOD          | NM_002023    | fibromodulin                                                                               | 2.91 | 0.00001  |
| 536 | MNS1          | NM_018365    | meiosis-specific nuclear structural protein 1                                              | 2.91 | 0.000009 |
| 537 | FBF1          | XM_371079    | Fas (TNFRSF6) binding factor 1                                                             | 2.9  | 0.000018 |
| 538 | CITED2        | NM_006079    | Cbp/p300-interacting transactivator, with Glu/Asp-rich carboxy-terminal domain, 2          | 2.88 | 0.000025 |
| 539 | RTTN          | NM_173630    | rotatin                                                                                    | 2.88 | 0.000005 |
| 540 | VRK1          | NM_003384    | vaccinia related kinase 1                                                                  | 2.87 | 0.000078 |
| 541 | RPS26         | NM_001029    | ribosomal protein S26                                                                      | 2.87 | 0.000009 |
| 542 | ICOSL         | NM_015259    | inducible T-cell co-stimulator ligand                                                      | 2.87 | 0.000008 |
| 543 | TTC9C         | NM_173810    | tetratricopeptide repeat domain 9C                                                         | 2.86 | 0.000029 |
| 544 | MCM6          | NM_005915    | MCM6 minichromosome maintenance deficient 6 (MIS5 homolog, S. pombe) (S. cerevisiae        | 2.85 | 0.000043 |
| 545 | SULT1A2       | NM_177528    | sulfotransferase family, cytosolic, 1A, phenol-preferring, member 2                        | 2.83 | 0.000029 |
| 546 | MT1X          | NM_005952    | metallothionein 1X                                                                         | 2.82 | 0.000066 |
| 547 | PPME1         | NM_016147    | protein phosphatase methyltransferase-1                                                    | 2.82 | 0.000007 |
| 548 | DKFZF586P0123 | NM_015531    | hypothetical protein                                                                       | 2.82 | 0.000007 |
| 549 | PTPN13        | NM_006264    | protein tyrosine phosphatase, non-receptor type 13 (APO-1/CD95 (Fas)-associated phosph     | 2.81 | 0.000022 |
| 550 | ABLIM1        | NM_002313    | actin binding LIM protein 1                                                                | 2.81 | 0.000001 |
| 551 | PEX11B        | NM_003846    | peroxisomal biogenesis factor 11B                                                          | 2.8  | 0.000001 |
| 552 | GNRHR2        | NR_002328    | gonadotropin-releasing hormone receptor 2                                                  | 2.8  | 0.000001 |
| 553 | HPCAL1        | NM_134421    | hippocalcin-like 1                                                                         | 2.8  | 0.000008 |

|     |            |              |                                                               |      |          |
|-----|------------|--------------|---------------------------------------------------------------|------|----------|
| 554 | NHLRC1     | NM_198586    | NHL repeat containing 1                                       | 2.79 | 0.000048 |
| 555 | PANK4      | NM_018216    | pantothenate kinase 4                                         | 2.79 | 0.000023 |
| 556 | FLJ35821   | NM_152589    | hypothetical protein FLJ35821                                 | 2.78 | 0.00003  |
| 557 | CD3EAP     | NM_012099    | CD3E antigen, epsilon polypeptide associated protein          | 2.77 | 0.000052 |
| 558 | PPP1R13L   | NM_006663    | protein phosphatase 1, regulatory (inhibitor) subunit 13 like | 2.77 | 0.000052 |
| 559 | BICD2      | NM_015250    | bicaudal D homolog 2 (Drosophila)                             | 2.77 | 0.000013 |
| 560 | OR52E2     | NM_001005164 | olfactory receptor, family 52, subfamily E, member 2          | 2.76 | 0.000058 |
| 561 | UBQLN4     | NM_020131    | ubiquilin 4                                                   | 2.75 | 0.000011 |
| 562 | KCNGB3     | NM_133329    | potassium voltage-gated channel, subfamily G, member 3        | 2.73 | 0.000019 |
| 563 | AKAP8      | NM_005858    | A kinase (PRKA) anchor protein 8                              | 2.72 | 0.000042 |
| 564 | NSUN3      | NM_022072    | NOL1/NOP2/Sun domain family, member 3                         | 2.72 | 0.000018 |
| 565 | DHFRL1     | NM_176815    | dihydrofolate reductase-like 1                                | 2.72 | 0.000018 |
| 566 | CHD1L      | NM_004284    | Homo sapiens chromodomain helicase DNA binding protein 1-like | 2.72 | 0.000015 |
| 567 | RBBP5      | NM_005057    | retinoblastoma binding protein 5                              | 2.71 | 0.000051 |
| 568 | THAP5      | NM_182529    | THAP domain containing 5                                      | 2.7  | 0.000021 |
| 569 | DNAJB9     | NM_012328    | DnaJ (Hsp40) homolog, subfamily B, member 9                   | 2.7  | 0.000021 |
| 570 | ESR1       | NM_000125    | estrogen receptor 1                                           | 2.69 | 0.000032 |
| 571 | CRIP2      | NM_001312    | cysteine-rich protein 2                                       | 2.66 | 0.000057 |
| 572 | ARHGGEF10L | NM_018125    | Rho guanine nucleotide exchange factor (GEF) 10-like          | 2.66 | 0.000041 |
| 573 | PCM1       | NM_006197    | pericentriolar material 1                                     | 2.63 | 0.000032 |
| 574 | ZNF228     | NM_013380    | zinc finger protein 228                                       | 2.62 | 0.000059 |
| 575 | C1orf118   | NM_199343    | chromosome 1 open reading frame 118                           | 2.62 | 0.000023 |
| 576 | C20orf86   | NM_080674    | chromosome 20 open reading frame 86                           | 2.58 | 0.000026 |
| 577 | ZW10       | NM_004724    | ZW10 homolog, centromere/kinetochore protein (Drosophila)     | 2.54 | 0.000072 |
| 578 | MRPS11     | NM_022839    | mitochondrial ribosomal protein S11                           | 2.5  | 0.000057 |
