# Supplementary material
Source: PubMed Central journal article supplement (PMC1829228)

### A. Pol II ChIP-DSL

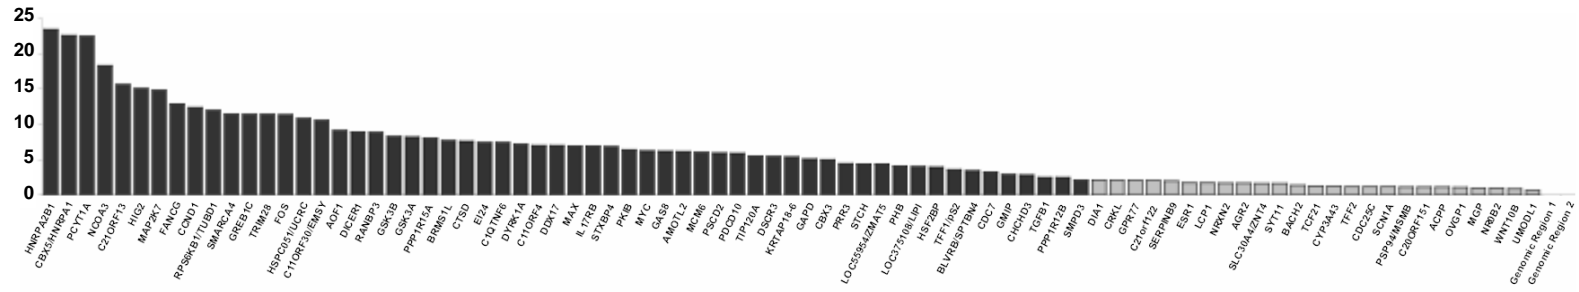

### B. Pol II ChIP-qPCR

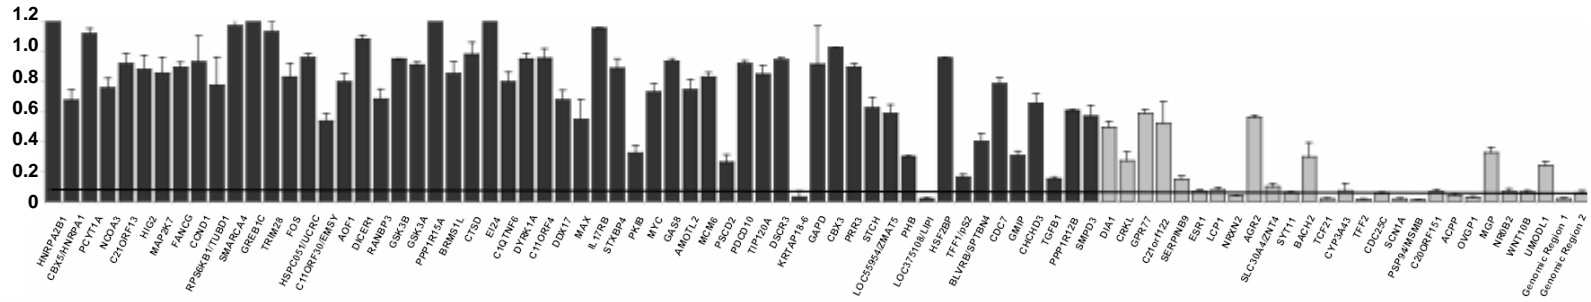

Supplement: pnas_0700715104_1.pdf [file pnas_0700715104_1.pdf]

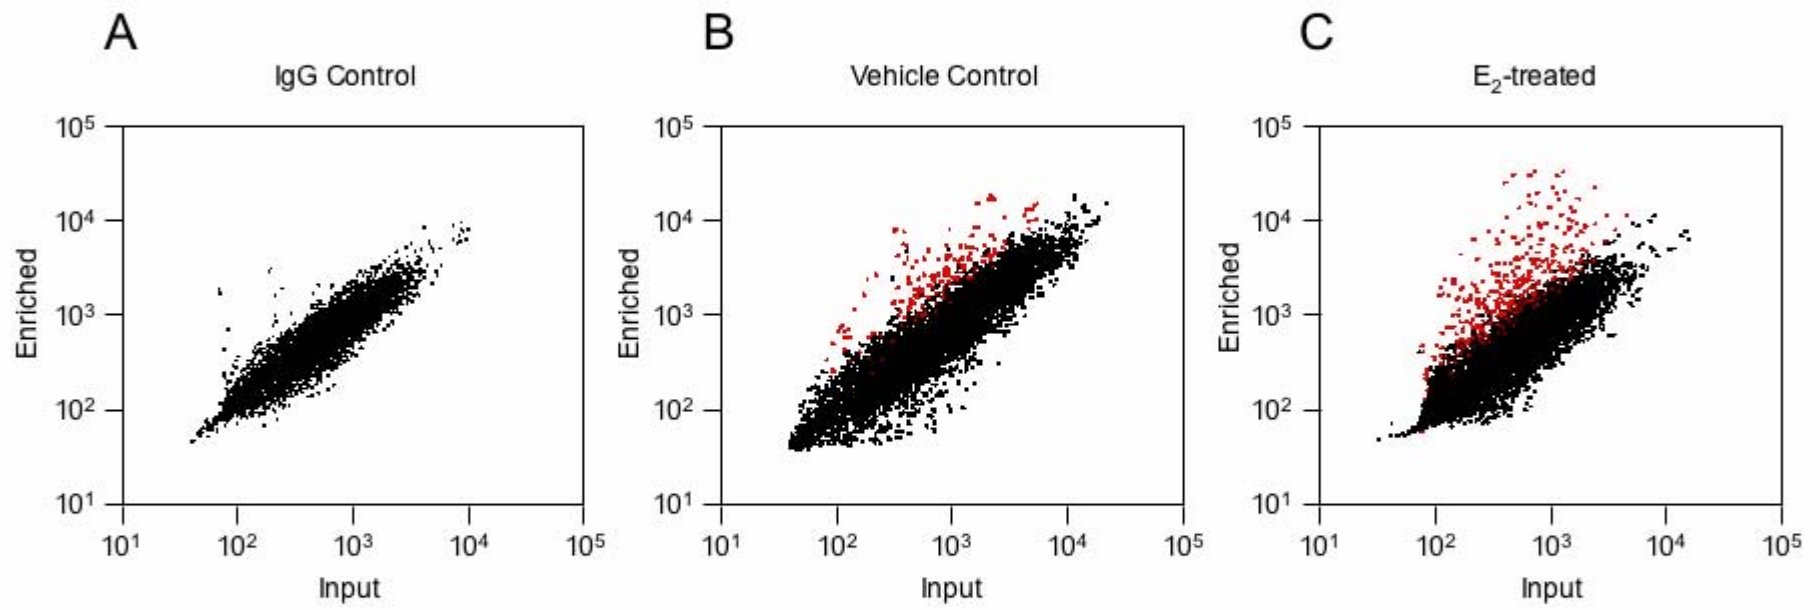

Supplement: pnas_0700715104_2.pdf [file pnas_0700715104_2.pdf]
